# Supplementary material for: Safety Assessment of Genetically Modified Feed: Is There Any Difference From Food?
Source: PubMed Central journal article supplement (PMC6918800; doi:10.3389/fpls.2019.01592), 2019-12-11

# Supplementary material

Figure S1: Difference between GM food and feed.

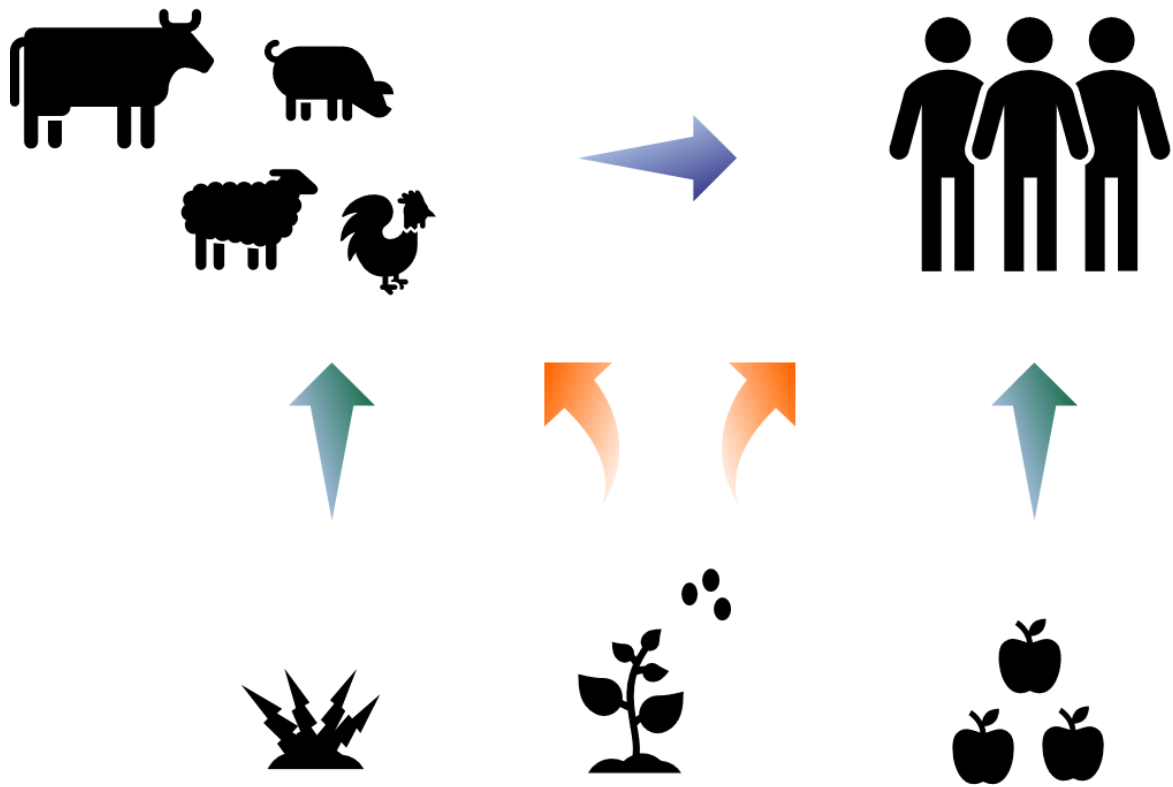

**Figure S2:** Different breeding techniques and its requirement for safety assessment before commercialisation.

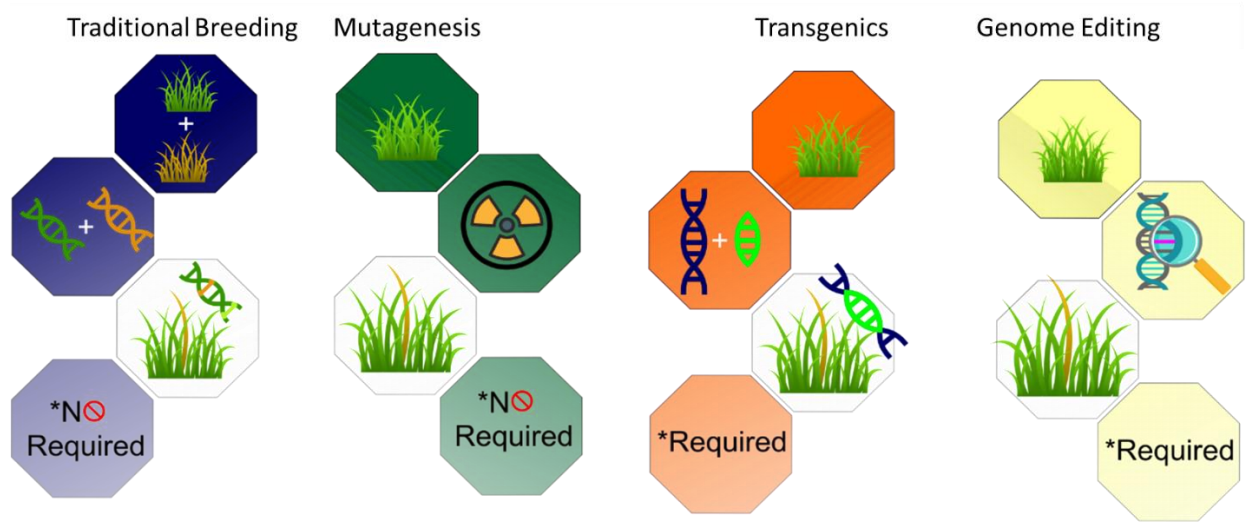

**Figure S3:** Pre and post-marketing issues to be solve before GM crops commercialisation.

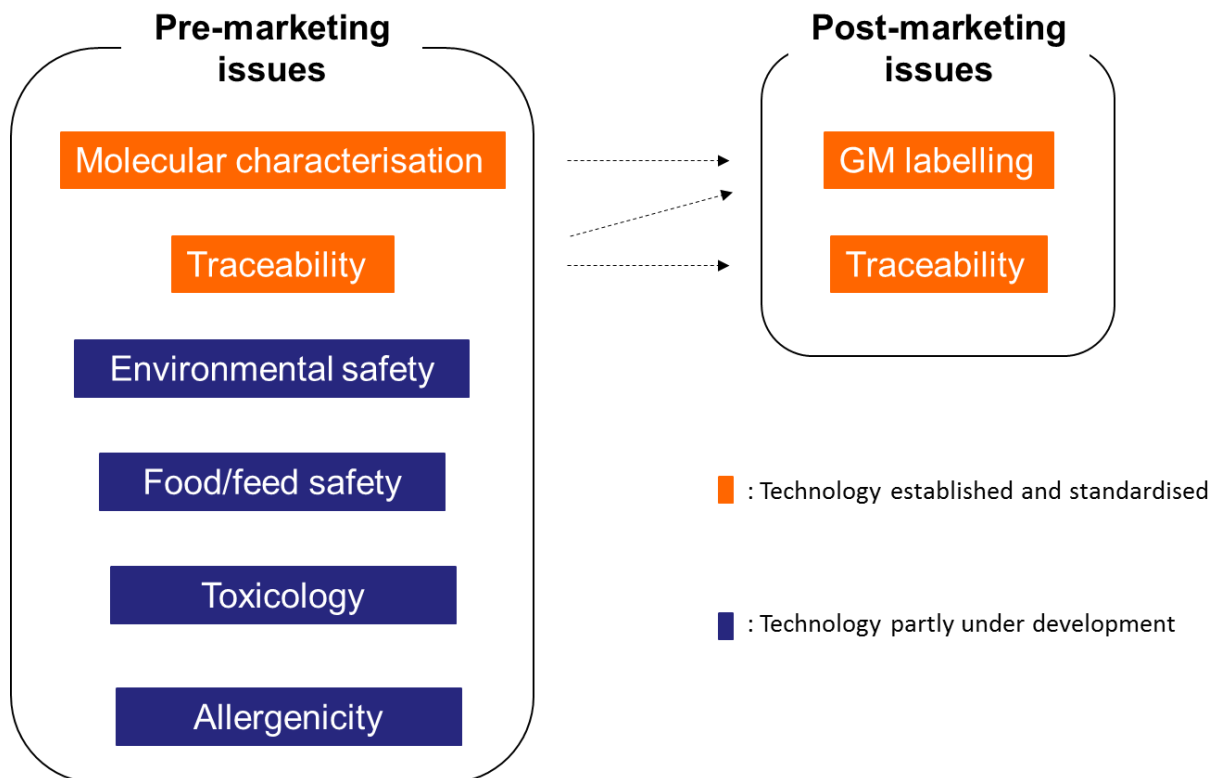

Figure S4: Comparison of qPCR, ddPCR and NGS.

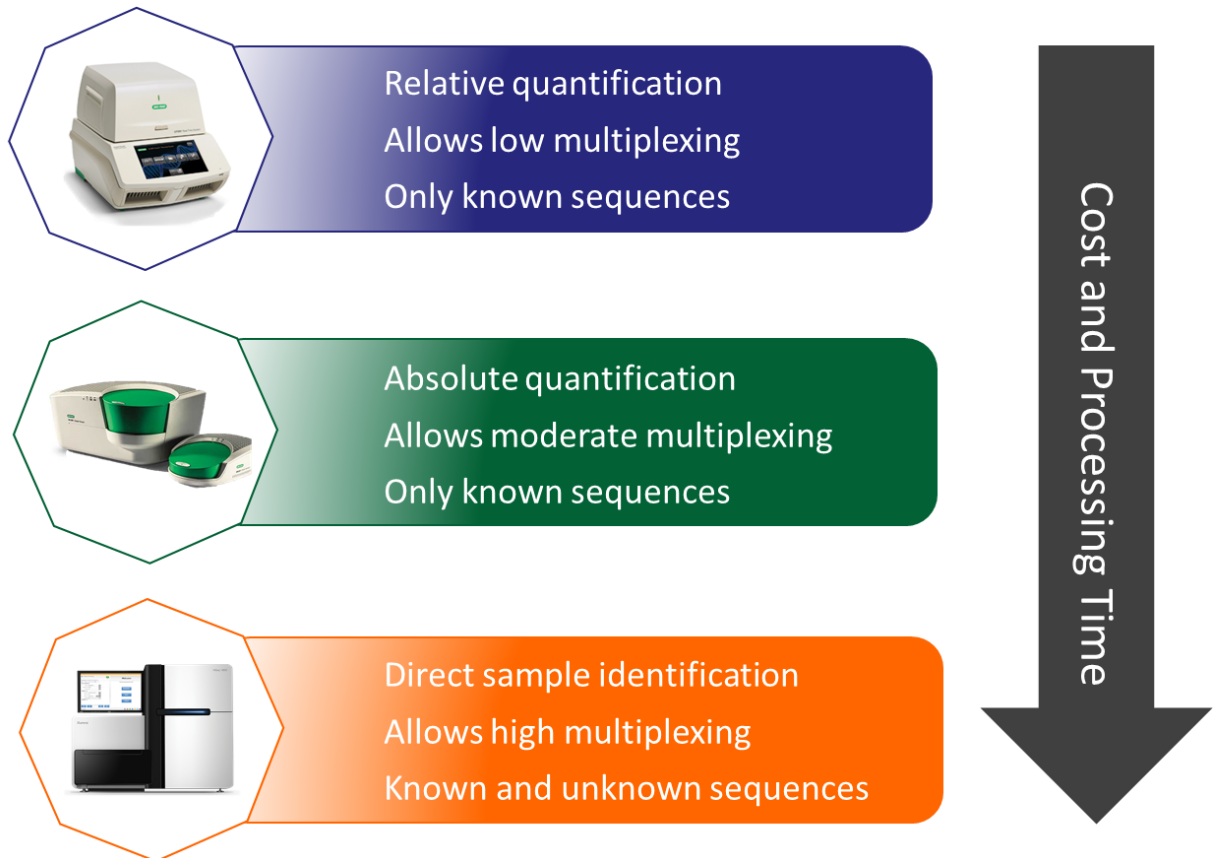

Supplement: Presentation_1.pdf [file Presentation_1.pdf]
